# Supplementary material for: Consumer-oriented review of digital diabetes prevention programs: insights from the CDC’s diabetes prevention recognition program
Source: Frontiers journal article supplement (doi:10.3389/fcdhc.2025.1562108), 2025-04-16
Supplement: Data_Sheet_1.pdf [file Data_Sheet_1.pdf]

## **Table of Contents**

1. **CDC Registry Data Collection Instrument**  
*(Page 2)*
2. **CDC "Find a Lifestyle Program" Data Collection Instrument**  
*(Page 3)*
3. **dDPP Website Data Collection Instrument**  
*(Page 5)*

# CDC Registry Data

---

Record ID

---

---

DPP Name

---

---

Address Line 1

---

---

Address Line 2

---

---

City

---

---

State

---

---

Zip

---

---

Phone

---

---

Email

---

---

Website listed

- ☐ Yes  
☐ No

---

Web Address

---

---

Recognition Status

- ☐ Pending  
☐ Preliminary  
☐ Full  
☐ Full Plus

---

Class Open to

- ☐ Public  
☐ Employees  
☐ Members  
☐ Other

## Find a Program Data

Record ID

---

Abstract information about each Digital DPP, also referred to as online (non-live), programs from this page:  
<https://www.cdc.gov/diabetes-prevention/lifestyle-change-program/find-a-program.html>

---

Name of data abstractor

- ☐ Benjamin Lalani  
☐ Jalene Shim  
☐ Vidhu Vadini  
☐ Yllka Valdez  
☐ Nestoras Mathioudakis
- 

The DPP name as listed on the CDC registry is: [dpp\_name].

The state listed is: [state]

---

Could the online program be identified on the CDC's  
Find a Program webpage?

- ☐ Yes  
☐ No
- 

Name of the program as listed on "Find a Lifestyle  
Change Program"

---

Is Link to "Visit Website" Provided?

- ☐ Yes  
☐ No
- 

Concordance between CDC Registry and Find a Program  
(website listed)

(0 = Neither; 1= CDC registry only; 2= Find a  
Program Only; 3 = Both)

---

List the url of the website link provided from the  
Find a Program Page

---

Concordance between CDC Registry and Find a Program  
(URL)

(1= match; 0= do not match)

---

Is the website link valid?

- ☐ Yes  
☐ No
- 

What happens when you click the link?

---

Which of the following Features tags are listed on  
Find A Program?

- ☐ Nationwide  
☐ Digital Scale  
☐ Accessible Scale  
☐ 24/7 Coach Support  
☐ Mobile App- Android  
☐ Mobile App- iOS  
☐ Offers a trial  
☐ Online Community  
☐ Self-paced  
☐ No feature tags listed

## Language Options

- ☐ English
- ☐ Spanish
- ☐ English but supplemented with Spanish materials
- ☐ Chinese
- ☐ English but supplemented with Chinese materials
- ☐ American Indian or Alaska Native language
- ☐ Native Hawaiian or Other Pacific Islander language or dialect
- ☐ English but supplemented with Native Hawaiian or Other Pacific Islander language or dialect material
- ☐ English but supplemented with American Indian or Alaska Native Language materials
- ☐ Other
- ☐ No language information provided (no feature tag)

## Payment Options

- ☐ Free of charge
- ☐ Private Insurer
- ☐ Employer
- ☐ Medicare
- ☐ Medicaid
- ☐ Self-pay
- ☐ Dual Eligible
- ☐ Grant funding
- ☐ Private/Commercial Insurer
- ☐ Other
- ☐ Government/Military
- ☐ Venture Capital
- ☐ No Payment information provided

## CDC-Recognized Organization Associated with this Site

(Cut and paste name, address, phone number)

**Validation**

Name of data validator

- ☐ Benjamin Lalani
- ☐ Jalene Shim
- ☐ Vidhu Vadini
- ☐ Yllka Valdez
- ☐ Nestoras Mathioudakis
- ☐ Daniel Zade

Date of data validation

Validation Issues/Comments

# Company Website Data - Organized

Record ID

Name of data abstractor

- ☐ Benjamin Lalani  
☐ Jalene Shim  
☐ Vidhu Vadini  
☐ Yllka Valdez  
☐ Nestoras Mathioudakis

Can you find a website associated with this DPP?

- ☐ Yes  
☐ No  
(either from CDC registry, Find a Program, or Google search)

URL on CDC Registry: [web\_address]

URL on Find a Program: [list\_url\_find\_a\_program]

List url of company website (as specific as possible for DPP)

(If the link provided on the CDC Registry or Find A Program is not valid but you are able to find the correct URL through a Google search, list here.)

Does company website provide specific and detailed information about the DPP?

- ☐ Yes  
☐ No  
(Beyond generic description of what the National DPP is -- i.e. specific aspects of the diabetes prevention program need to be mentioned.)

Does it seem like the digital (online) DPP may have been misclassified (i.e. distance learning video conference or in-person sessions)?

- ☐ Yes  
☐ No

Is there evidence the DPP is out-of-service or not currently available?

- ☐ Yes  
☐ No

Type of Digital DPP

- ☐ Proprietary (developed by company)  
☐ External DPP (e.g. HALT) offered  
☐ Unclear

URL of external DPP

## Program Credibility

Credibility-Related Information Listed on Company Website

- ☐ Clinically validated publications  
☐ Company publications/ White papers  
☐ CDC recognition status (i.e. Full, Full Plus, etc.)  
☐ Claim of endorsement/collaboration (e.g. ADA, celebrity)  
☐ Awards Received  
☐ News articles/ media attention  
☐ Other

---

Number of clinically validated (i.e. peer reviewed publications specifically on the DPP)

---

---

Are links to the actual publications provided?

- ☐ Yes  
☐ No
- 

---

Number of company publications/whitepapers (specific to Diabetes)

---

---

Are links to the company white papers/publications actually provided?

- ☐ Yes  
☐ No  
(This is non peer-reviewed papers. Mark no if individual must provide their contact information in order to get the paper.)
- 

---

What CDC recognition status is listed on company website

- ☐ Pending  
☐ Preliminary  
☐ Full  
☐ Full Plus  
☐ Not specified
- 

---

List professional groups/societies/companies/celebrities that the company claims to have endorsed or collaborated with their product

---

(separate each entity with comma. For example, American Heart Association, American Diabetes Association)

---

---

Number of awards received

---

---

List names of awards received

---

(name award)

---

---

News Articles / Media Attention

---

(separate each article title by a comma)

---

---

Other Claim of Program Credibility

---

### Clinical Performance/Outcomes

---

Information listed on Company Website

- ☐ Weight loss  
☐ Physical activity outcomes  
☐ A1C outcomes  
☐ Engagement outcomes (e.g., retention)  
☐ Number of members/participants  
☐ Other
- 

---

What type of weight loss outcome is reported?

- ☐ Average weight loss (lbs or kg)  
☐ Average % weight loss  
☐ % of people meeting 5% weight loss  
☐ % of people meeting >5% weight loss  
☐ Other

---

Average Weight Loss (lbs or kgs)

---

---

Average % Weight Loss

---

---

% of people meeting 5% weight loss

---

---

% of people meeting >5% weight loss

---

---

Other Weight Loss Outcome

---

---

What type of physical activity outcome is reported?

- ☐ Average minutes / week of physical activity  
☐ % of participants meeting 150 minutes of activity / week  
☐ Average increase in minutes/week of physical activity  
☐ Other

---

Average minutes / week of physical activity

---

---

% of participants meeting 150 minutes of activity / week

---

---

Average increase in minutes/week of physical activity

---

---

Other physical activity outcome reported

---

---

What type of A1C outcomes are reported?

- ☐ Average A1C  
☐ Average change in A1C  
☐ % of participants meeting A1C decrease of 0.2 or greater  
☐ % of participants with normal A1C after completing program  
☐ Other

---

Average A1C

---

---

% of participants meeting A1C decrease of 0.2 or greater

---

---

% of participants with normal A1C after completing program

---

---

Average change in A1C

---

---

Other A1C Outcome

---

---

What type of engagement outcomes are reported?

- ☐ Program Completion Rate
- ☐ Lesson Completion
- ☐ Daily Logins
- ☐ Weekly Active Users
- ☐ Food Logging Frequency
- ☐ Physical Activity Tracking Frequency
- ☐ Weight Tracking Frequency
- ☐ Time Spent on Platform
- ☐ Feature Adoption Rate (% of participants using specific features)
- ☐ Responsiveness to prompts/reminders
- ☐ Retention Rate (% of participants who remain active over a specified period)
- ☐ Other

---

Program Completion Rate

---

---

Lesson Completion

---

---

Daily Logins

---

---

Weekly Active Users

---

---

Food Logging Frequency

---

---

Physical Activity Tracking Frequency

---

---

Weight Tracking Frequency

---

---

Time Spent on Platform

---

---

Feature Adoption Rate (% of participants using specific features)

---

---

Responsiveness to prompts/reminders

---

---

Retention Rate (% of participants who remain active over a specified period)

---

---

Other Engagement Outcome

---

---

List number of members/participants company claims to have used their product

---

---

Other Clinical Performance Measures

---



## Program-Specific Features

|                                                                       |                                                                                                                                                                                                                                                                                                                                                                                                                                                                                                                                                                                                                                                                                                                                                                                                        |
|-----------------------------------------------------------------------|--------------------------------------------------------------------------------------------------------------------------------------------------------------------------------------------------------------------------------------------------------------------------------------------------------------------------------------------------------------------------------------------------------------------------------------------------------------------------------------------------------------------------------------------------------------------------------------------------------------------------------------------------------------------------------------------------------------------------------------------------------------------------------------------------------|
| Platform                                                              | <input type="radio"/> Mobile app<br><input type="radio"/> Web page<br><input type="radio"/> Both                                                                                                                                                                                                                                                                                                                                                                                                                                                                                                                                                                                                                                                                                                       |
| Program Specific Features                                             | <input type="checkbox"/> Technology offered (e.g., digital scale, Fitbit)<br><input type="checkbox"/> Technology integration (e.g., Apple Watch, Google Fit)<br><input type="checkbox"/> AI technology (e.g., chatbot, photo-based meal detection)<br><input type="checkbox"/> Health information dashboard on website/app<br><input type="checkbox"/> Automated reminders (e.g., medication timing, meal timing, SMS / app notifications)<br><input type="checkbox"/> Human coaching option<br><input type="checkbox"/> Self-paced program<br><input type="checkbox"/> Informational/demo videos about program<br><input type="checkbox"/> Educational video libraries<br><input type="checkbox"/> Expected duration of program<br><input type="checkbox"/> Food subscriptions / meal delivery / etc. |
| Expected Duration of Program                                          | <div style="border-bottom: 1px solid black; width: 100%;"></div> (enter in months)                                                                                                                                                                                                                                                                                                                                                                                                                                                                                                                                                                                                                                                                                                                     |
| AI technology                                                         | <input type="checkbox"/> AI-driven health recommendations<br><input type="checkbox"/> Photo-based meal detection<br><input type="checkbox"/> Other<br><div style="border-bottom: 1px solid black; width: 100%;"></div> (enter in months)                                                                                                                                                                                                                                                                                                                                                                                                                                                                                                                                                               |
| AI technology - Other                                                 | <div style="border-bottom: 1px solid black; width: 100%;"></div> (enter in months)                                                                                                                                                                                                                                                                                                                                                                                                                                                                                                                                                                                                                                                                                                                     |
| Which of the following tags can be inferred from the company website? | <input type="checkbox"/> Nationwide<br><input type="checkbox"/> Digital Scale<br><input type="checkbox"/> Accessible Scale<br><input type="checkbox"/> 24/7 Coach Support<br><input type="checkbox"/> Mobile App- Android<br><input type="checkbox"/> Mobile App- iOS<br><input type="checkbox"/> Mobile App- not specified<br><input type="checkbox"/> Offers a trial<br><input type="checkbox"/> Online Community<br><input type="checkbox"/> Self-paced                                                                                                                                                                                                                                                                                                                                             |

## Technologies Provided or Capable of Integrating

|                                                             | Offered (physical device or in-app feature) | Integration Possible (with external device or external app) |
|-------------------------------------------------------------|---------------------------------------------|-------------------------------------------------------------|
| Digital scales (monitor weight/transmit data automatically) | <input type="checkbox"/>                    | <input type="checkbox"/>                                    |
| Activity trackers (e.g. Fitbit, Garmin, Apple Watch)        | <input type="checkbox"/>                    | <input type="checkbox"/>                                    |

|                                                                                 |                          |                          |
|---------------------------------------------------------------------------------|--------------------------|--------------------------|
| CGMs (e.g. Dexcom, Libre)                                                       | <input type="checkbox"/> | <input type="checkbox"/> |
| Smart Blood Pressure Monitors                                                   | <input type="checkbox"/> | <input type="checkbox"/> |
| Mobile apps - customized program apps for tracking goals, diet, and exercise    | <input type="checkbox"/> | <input type="checkbox"/> |
| Wearable heart rate monitors (tracking cardiovascular metrics)                  | <input type="checkbox"/> | <input type="checkbox"/> |
| Sleep trackers                                                                  | <input type="checkbox"/> | <input type="checkbox"/> |
| Nutrition tracking tools (apps/devices to log food intake and nutritional info) | <input type="checkbox"/> | <input type="checkbox"/> |
| Telehealth platforms (virtual health coaching sessions/consultations)           | <input type="checkbox"/> | <input type="checkbox"/> |
| Digital food scales (portion control, calorie tracking)                         | <input type="checkbox"/> | <input type="checkbox"/> |
| Glucose Meters for periodic blood glucose checks                                | <input type="checkbox"/> | <input type="checkbox"/> |
| Other technology                                                                | <input type="checkbox"/> | <input type="checkbox"/> |

Describe other technology

---

Does the digital platform extend to health conditions or behaviors besides prediabetes (e.g. sleep, mental health, type 2 diabetes, etc.)?

- ☐ Yes  
☐ No

Which other health conditions or behaviors does the digital platform extend to besides prediabetes?

- ☐ Obesity/weight management  
☐ Hypertension  
☐ Type 2 diabetes  
☐ Heart failure  
☐ Medication adherence  
☐ Mental wellbeing  
☐ Sleep  
☐ Coronary heart disease  
☐ Hyperlipidemia  
☐ Other

Other health conditions not listed above

---

## User Experience and Support

Information listed on Company Website

- ☐ Satisfaction scores (e.g., App Store rating, Net Promoter Score)  
☐ Patient testimonials  
☐ FAQ page

What type of satisfaction scores are reported?

- ☐ App Store rating  
☐ Net Promoter Score (NPS)  
☐ Customer Satisfaction Score  
☐ Other

---

Net Promoter Score

---

---

Describe other satisfaction measure

---

---

### Eligibility, Payment, Access Barriers

---

Information listed on Company Website

- ☐ Eligibility (payment options)
  - ☐ Provide contact information (Name/Email) to learn more about program
  - ☐ Languages offered
  - ☐ Other
- 

Other Eligibility / Access-related Information

---

---

Language Options

- ☐ English
  - ☐ Spanish
  - ☐ English but supplemented with Spanish materials
  - ☐ Chinese
  - ☐ English but supplemented with Chinese materials
  - ☐ American Indian or Alaska Native language
  - ☐ Native Hawaiian or Other Pacific Islander language or dialect
  - ☐ English but supplemented with Native Hawaiian or Other Pacific Islander language or dialect material
  - ☐ English but supplemented with American Indian or Alaska Native Language materials
  - ☐ Other
  - ☐ No language information provided (no feature tag)
- 

Other Language Offered

---

---

### Validation

---

Name of data validator

- ☐ Benjamin Lalani
  - ☐ Jalene Shim
  - ☐ Vidhu Vadini
  - ☐ Yllka Valdez
  - ☐ Nestoras Mathioudakis
  - ☐ Daniel Zade
- 

Date of data validation

---

---

Issues/Comments identified during data validation

---
